# Supplementary material
Source: publisher site journal article supplement (https://www.dovepress.com/article/338712)
Supplement: Supplementary file 1 [file get_supplementary_file.php]

**Supplement Table 1** Logistic regression models for delirium after cardiac surgery adjusted for diabetes, preoperative hemoglobin A1c and the type of glycemic agents.

| Variable | Unadjusted odd ratio  (95% CI) | *p* value | Adjusted odd ratio  (95% CI) | *p* value |
| --- | --- | --- | --- | --- |
| **Adjusted for diabetes only** |  |  |  |  |
| Age ≥ 65 yearsa | 2.267 (1.666, 3.087) | <0.001 | 1.687 (1.157, 2.459) | 0.007 |
| Education below high school | 2.299 (1.669, 3.165) | <0.001 | 1.723 (1.168, 2.540) | 0.006 |
| GFR < 60 mL/min/1.73m2 | 2.593 (1.833, 3.668) | <0.001 | 2.479 (1.668, 3.684) | <0.001 |
| Type of surgery |  |  |  |  |
| Isolated CABG | 1.0 (Reference) |  | 1.0 (Reference) |  |
| Valve surgeryb | 1.883 (1.301, 2.726) | <0.001 | 2.145 (1.373, 3.349) | <0.001 |
| Aortic surgeryc | 3.562 (2.324, 5.431) | <0.001 | 3.687 (2.154, 6.312) | <0.001 |
| CPB duration ≥ 88 min2 | 2.400 (1.767, 3.261) | <0.001 | 1.628 (1.133, 2.340) | 0.008 |
| Mean BIS ≥ 34a | 1.472 (1.091, 1.986 | 0.011 | 1.441 (1.026, 2.025) | 0.035 |
| VIS at end of surgery ≥ 5.0a,d | 1.617 (1.195, 2.189) | 0.002 | 1.762 (1.237, 2.509) | 0.002 |
| Diabetes | 1.066 (0.773, 1.471) | 0.696 | 1.232 (0.831, 1.826) | 0.300 |
| Glycemic CVe |  |  |  |  |
| First quartile (< 15%) | 1.0 (Reference) |  | 1.0 (Reference) |  |
| Second quartile (15-20%) | 1.358 (0.871, 2.118) | 0.177 | 1.319 (0.811, 2.146) | 0.264 |
| Third quartile (20-25%) | 1.891 (1.219, 2.935) | 0.004 | 1.837 (1.134, 2.976) | 0.013 |
| Fourth quartile (> 25%) | 3.934 (2.516, 6.151) | <0.001 | 3.666 (2.247, 5.980) | <0.001 |
| **Adjusted for preoperative hemoglobin A1c only** | |  |  |  |
| Age ≥ 65 yearsa | 2.267 (1.666, 3.087) | <0.001 | 1.719 (1.182, 2.501) | 0.005 |
| Education below high school | 2.299 (1.669, 3.165) | <0.001 | 1.707 (1.157, 2.519) | 0.007 |
| GFR < 60 mL/min/1.73m2 | 2.593 (1.833, 3.668) | <0.001 | 2.542 (1.715, 3.766) | <0.001 |
| Type of surgery |  |  |  |  |
| Isolated CABG | 1.0 (Reference) |  | 1.0 (Reference) |  |
| Valve surgeryb | 1.883 (1.301, 2.726) | <0.001 | 2.126 (1.362, 3.321) | <0.001 |
| Aortic surgeryc | 3.562 (2.324, 5.431) | <0.001 | 3.596 (2.114, 6.086) | <0.001 |
| CPB duration ≥ 88 min2 | 2.400 (1.767, 3.261) | <0.001 | 1.629 (1.021, 2.014) | 0.008 |
| Mean BIS ≥ 34a | 1.472 (1.091, 1.986 | 0.011 | 1.434 (1.021, 2.014) | 0.038 |
| VIS at end of surgery ≥ 5.0a,d | 1.617 (1.195, 2.189) | 0.002 | 1.739 (1.222, 2.475) | 0.002 |
| Preoperative hemoglobin A1c | 1.012 (0.897, 1.140) | 0.848 | 1.068 (0.924, 1.233) | 0.373 |
| Glycemic CVe |  |  |  |  |
| First quartile (< 15%) | 1.0 (Reference) |  | 1.0 (Reference) |  |
| Second quartile (15-20%) | 1.358 (0.871, 2.118) | 0.177 | 1.310 (0.806, 2.131) | 0.276 |
| Third quartile (20-25%) | 1.891 (1.219, 2.935) | 0.004 | 1.832 (1.131, 2.967) | 0.014 |
| Fourth quartile (> 25%) | 3.934 (2.516, 6.151) | <0.001 | 3.625 (2.223, 5.911) | <0.001 |
| **Adjusted for the type of hypoglycemic agents only** | |  |  |  |
| Age ≥ 65 yearsa | 2.267 (1.666, 3.087) | <0.001 | 1.692 (1.161, 2.468) | 0.006 |
| Education below high school | 2.299 (1.669, 3.165) | <0.001 | 1.711 (1.159, 2.526) | 0.007 |
| GFR < 60 mL/min/1.73m2 | 2.593 (1.833, 3.668) | <0.001 | 2.471 (1.658, 3.681) | <0.001 |
| Type of surgery |  |  |  |  |
| Isolated CABG | 1.0 (Reference) |  | 1.0 (Reference) |  |
| Valve surgeryb | 1.883 (1.301, 2.726) | <0.001 | 2.186 (1.392, 3.433) | <0.001 |
| Aortic surgeryc | 3.562 (2.324, 5.431) | <0.001 | 3.749 (2.176, 6.460) | <0.001 |
| CPB duration ≥ 88 min2 | 2.400 (1.767, 3.261) | <0.001 | 1.618 (1.124, 2.328) | 0.010 |
| Mean BIS ≥ 34a | 1.472 (1.091, 1.986 | 0.011 | 1.447 (1.029, 2.034) | 0.034 |
| VIS at end of surgery ≥ 5.0a,d | 1.617 (1.195, 2.189) | 0.002 | 1.759 (1.235, 2.504) | 0.002 |
| Type of hypoglycemic agents |  |  |  |  |
| None | 1.0 (Reference) |  | 1.0 (Reference) |  |
| Diet only | 0.665 (0.164, 2.690) | 0.567 | 0.891 (0.189, 4.200) | 0.884 |
| Oral | 1.072 (0.759, 1.515) | 0.692 | 1.266 (0.834, 1.922) | 0.269 |
| Insulin | 1.228 (0.549, 2.745) | 0.617 | 1.357 (0.535, 3.441) | 0.521 |
| Glycemic CVe |  |  |  |  |
| First quartile (< 15%) | 1.0 (Reference) |  | 1.0 (Reference) |  |
| Second quartile (15-20%) | 1.358 (0.871, 2.118) | 0.177 | 1.314 (0.807, 2.140) | 0.272 |
| Third quartile (20-25%) | 1.891 (1.219, 2.935) | 0.004 | 1.827 (1.127, 2.960) | 0.014 |
| Fourth quartile (> 25%) | 3.934 (2.516, 6.151) | <0.001 | 3.653 (2.239, 5.960) | <0.001 |
| **Adjusted for diabetes, preoperative hemoglobin A1c and the type of hypoglycemic agents** | | | | |
| Age ≥ 65 yra | 2.267 (1.666, 3.087) | <0.001 | 1.696 (1.162, 2.476) | 0.006 |
| Education below high school | 2.299 (1.669, 3.165) | <0.001 | 1.705 (1.154, 2.518) | 0.007 |
| GFR < 60 mL/min/1.73m2 | 2.593 (1.833, 3.668) | <0.001 | 2.481 (1.663, 3.702) | <0.001 |
| Type of surgery |  |  |  |  |
| Isolated CABG | 1.0 (Reference) |  | 1.0 (Reference) |  |
| Valve surgeryb | 1.883 (1.301, 2.726) | <0.001 | 2.209 (1.400, 3.486) | <0.001 |
| Aortic surgeryc | 3.562 (2.324, 5.431) | <0.001 | 3.773 (2.186, 6.512) | <0.001 |
| CPB duration ≥ 88 min2 | 2.400 (1.767, 3.261) | <0.001 | 1.621 (1.126, 2.333) | 0.009 |
| Mean BIS ≥ 34a | 1.472 (1.091, 1.986 | 0.011 | 1.445 (1.028, 2.032) | 0.034 |
| VIS at end of surgery ≥ 5.0a,d | 1.617 (1.195, 2.189) | 0.002 | 1.755 (1.231, 2.500) | 0.002 |
| Diabetes | 1.066 (0.773, 1.471) | 0.696 | 1.017 (0.453, 2.279) | 0.968 |
| Preoperative hemoglobin A1c | 1.012 (0.897, 1.140) | 0.848 | 1.028 (0.864, 1.223) | 0.754 |
| Type of hypoglycemic agents |  |  |  |  |
| None | 1.0 (Reference) |  | 1.0 (Reference) |  |
| Diet only | 0.665 (0.164, 2.690) | 0.567 | 0.860 (0.162, 4.569) | 0.860 |
| Oral | 1.072 (0.759, 1.515) | 0.692 | 1.201 (0.538, 2.682) | 0.655 |
| Insulin | 1.228 (0.549, 2.745) | 0.617 | 1.268 (0.386, 4.166) | 0.696 |
| Glycemic CVe |  |  |  |  |
| First quartile (< 15%) | 1.0 (Reference) |  | 1.0 (Reference) |  |
| Second quartile (15-20%) | 1.358 (0.871, 2.118) | 0.177 | 1.313 (0.806, 2.139) | 0.274 |
| Third quartile (20-25%) | 1.891 (1.219, 2.935) | 0.004 | 1.829 (1.128, 2.966) | 0.014 |
| Fourth quartile (> 25%) | 3.934 (2.516, 6.151) | <0.001 | 3.643 (2.232, 5.946) | <0.001 |

**Note:**. aCategorized by median value. bIsolated valvular surgery, CABG combined with valvular surgery. cIsolated aortic surgery, CABG and/or valvular surgery combined with aortic surgery. d1 x dopamine + 1 x dobutamine + 100 x isoproterenolol + 100 x norepinephrine + 100 x epinephrine + 10 x milrinone + 10000 x vasopressin. e(Standard deviation / Mean) x 100.

**Abbreviations:** CI, confidence interval; GFR, glomerular filtration rate; CABG, coronary artery bypass graft surgery; CPB, cardiopulmonary bypass; BIS, bispectral index; VIS, vasoactive-inotropic score; CV, coefficient of variation.

**Supplement Table 2** Baseline characteristics of the patients by surgery.

| Variable | Isolated CABG  (*n* = 208) | Valve surgerya  (*n* = 326) | Aortic surgeryb  (*n* = 171) | *p* value |
| --- | --- | --- | --- | --- |
| **Age, years** | 67 [61, 74] | 64 [54, 73] | 67 [58, 76] | 0.001 |
| **Female** | 49 (23.56%) | 163 (50.00%) | 76 (44.44%) | <0.001 |
| **BMI, kg/m2** | 24.13 [22.40, 26.20] | 23.04 [20.88, 25.32] | 23.53 [20.99, 26.07] | 0.002 |
| **Education below high school** | 59 (28.37%) | 107 (32.82%) | 67 (39.18%) | <0.001 |
| **Smoking** | 84 (40.38%) | 75 (23.01%) | 60 (35.09%) | <0.001 |
| Alcohol | 35 (16.83%) | 37 (11.35%) | 27 (15.79%) | 0.155 |

**Notes:** Values are presented as median [IQR], or number of patients (percentage). aIsolated valve surgery, CABG combined with valve surgery. bIsolated aortic surgery, CABG and/or valve surgery combined with aortic surgery.

**Abbreviations:** CABG, coronary artery bypass graft surgery; BMI, body mass index.

**Supplement Table 3** Preoperative variables of the patients by surgery.

| Variable | Isolated CABG  (*n* = 208) | Valve surgerya  (*n* = 326) | Aortic surgeryb  (*n* = 171) | *p* value |
| --- | --- | --- | --- | --- |
| Underlying disease |  |  |  |  |
| **Hypertension** | 142 (68.27%) | 166 (50.92%) | 106 (61.99%) | <0.001 |
| **Diabetes** | 111 (53.37%) | 77 (23.62%) | 30 (17.54%) | <0.001 |
| **Dyslipidemia** | 151 (72.60%) | 135 (41.41%) | 76 (44.44%) | <0.001 |
| **Chronic kidney diseasec** | 20 (9.62%) | 9 (2.76%) | 8 (4.68%) | 0.002 |
| **Chronic lung disease** | 11 (5.29%) | 39 (11.96%) | 15 (8.77%) | 0.033 |
| Liver disease | 13 (6.25%) | 28 (8.59%) | 7 (4.09%) | 0.156 |
| **Peripheral vascular disease** | 22 (10.58%) | 19 (5.83%) | 25 (14.62%) | 0.005 |
| **Cerebrovascular disease** | 65 (31.25%) | 64 (19.63%) | 28 (16.37%) | 0.001 |
| Neuropsychiatric disease | 17 (8.17%) | 47 (14.42%) | 24 (14.04%) | 0.081 |
| Immunocompromised | 2 (0.96%) | 8 (2.45%) | 3 (1.75%) | 0.456 |
| **Endocarditis** | 1 (0.48%) | 52 (15.95%) | 4 (2.34%) | <0.001 |
| **History of atrial fibrillation** | 16 (7.69%) | 108 (33.13%) | 25 (14.62%) | <0.001 |
| Medications |  |  |  |  |
| **Delirium-related drug used** | 39 (18.75%) | 89 (27.30%) | 35 (20.47%) | 0.047 |
| **Polypharmacye** | 144 (69.23%) | 174 (53.37%) | 71 (41.52%) | <0.001 |
| Preoperative parameters |  |  |  |  |
| **Prior cardiac surgery** | 1 (0.48%) | 40 (12.27%) | 19 (11.11%) | <0.001 |
| **Emergency** | 30 (14.42%) | 32 (9.82%) | 52 (30.41%) | <0.001 |
| **NYHA classification III & IV** | 65 (31.25%) | 123 (37.73%) | 40 (23.39%) | 0.005 |
| **EuroSCORE II, %** | 1.48 [0.96, 3.08] | 1.96 [1.07, 3.64] | 3.37 [1.73, 6.47] | <0.001 |
| **Ejection fraction, %** | 57.1 [44.4, 62.0] | 60.0 [55.0, 64.0] | 60.0 [54.5, 63.0] | <0.001 |
| Laboratory findings |  |  |  |  |
| **Hematocrit, %** | 37.6 [33.7, 41.4] | 36.6 [31.9, 40.5] | 38.2 [34.7, 41.4] | <0.017 |
| GFR, mL/min/1.73m2 | 73.89 [53.16, 94.58] | 77.84 [60.88, 91.25] | 78.28 [61.09, 93.18] | 0.314 |
| **Albumin, g/dL** | 4.1 [3.7, 4.4] | 4.0 [3.4, 4.3] | 4.0 [3.6, 4.3] | 0.006 |
| **C-reactive protein, mg/dL** | 0.14 [0.04, 0.39] | 0.23 [0.06, 1.24] | 0.19 [0.07, 1.43] | 0.004 |
| Sodium disturbancef | 10 (4.81%) | 33 (10.12%) | 15 (8.77%) | 0.089 |

**Note:** Values are presented as median [IQR], or number of patients (percentage). aIsolated valve surgery, CABG combined with valve surgery. bIsolated aortic surgery, CABG and/or valve surgery combined with aortic surgery. cPatients with chronic kidney disease requiring dialysis. dUse of any medication known to cause delirium according to in the American Geriatric Society Beers Criteria. eUse of five or more medications daily. fAbnormal value of serum sodium (< 136 mmol/L or > 145 mmol/L).

**Abbreviations:** CABG, coronary artery bypass graft surgery; NYHA, New York Heart Association; EuroSCORE, European System for Cardiac Operative Risk Evaluation; GFR, glomerular filtration rate.

**Supplement Table 4** Intraoperative variables of the patients by surgery.

| Variable | Isolated CABG  (*n* = 208) | Valve surgerya  (*n* = 326) | Aortic surgeryb  (*n* = 171) | *p* value |
| --- | --- | --- | --- | --- |
| Surgical parameters |  |  |  |  |
| **Surgery duration, min** | 210 [180, 235] | 160 [135, 195] | 205 [180, 240] | <0.001 |
| **CPB duration, min** | 71 [54, 89] | 90 [70, 115] | 106 [89, 128] | <0.001 |
| **TCA use** | 0 (0.00%) | 0 (0.00%) | 29 (16.96%) | <0.001 |
| Fluid balance |  |  |  |  |
| **Total fluid administration, mL** | 2400 [1775, 3410] | 1650 [1200, 2200] | 2500 [1820, 3500] | <0.001 |
| **PRC transfusion, pack** | 2.0 [1.5, 3.0] | 3.0 [2.0, 4.0] | 4.8 [3.0, 6.0] | <0.001 |
| **Urine output, mL/kg/hr** | 2.15 [1.20, 3.29] | 2.31 [1.31, 3.68] | 1.47 [0.76, 2.35] | <0.001 |
| Cerebral parameters |  |  |  |  |
| **Mean BIS** | 34 [28, 40] | 35 [30, 40] | 32 [25, 40] | 0.001 |
| Mean cerebral oximeter, % | 53 [45, 58] | 55 [46, 57] | 55 [49, 59] | 0.105 |
| Intraoperative parameters |  |  |  |  |
| **Highest lactic acid, mmol/L** | 1.9 [1.4, 2.5] | 2.4 [1.7, 3.2] | 3.3 [2.4, 4.5] | <0.001 |
| **VIS at end of surgeryc** | 5.0 [3.0, 10.0] | 5.0 [2.0, 9.6] | 4.0 [2.5, 7.0] | 0.004 |

**Note:** Values are presented as median [IQR], or number of patients (percentage). aIsolated valve surgery, CABG combined with valve surgery. bIsolated aortic surgery, CABG and/or valve surgery combined with aortic surgery. c1 x dopamine + 1 x dobutamine + 100 x isoproterenolol + 100 x norepinephrine + 100 x epinephrine + 10 x milrinone + 10000 x vasopressin.

**Abbreviations:** CABG, coronary artery bypass graft surgery; CPB, cardiopulmonary bypass; TCA, total circulatory arrest; PRC, packed red blood cells; BIS, bispectral index; VIS, vasoactive-inotropic score.

**Supplement Table 5** Preoperative and intraoperative glycemic variables of the patients by surgery.

| Variable | Isolated CABG  (*n* = 208) | Valve surgerya  (*n* = 326) | Aortic surgeryb  (*n* = 171) | *p* value |
| --- | --- | --- | --- | --- |
| Preoperative variables |  |  |  |  |
| **HbA1c, %** | 6.4 [5.7, 7.3] | 5.6 [5.2, 6.2] | 5.6 [5.4, 6.1] | <0.001 |
| **Glucose at admission, mg/dL** | 118 [95, 152] | 99 [89, 114] | 103 [91, 126] | <0.001 |
| **Type of hypoglycemic agent** |  |  |  | <0.001 |
| **None** | 97 (46.63%) | 254 (77.91%) | 143 (83.63%) |  |
| **Diet only** | 4 (1.92%) | 5 (1.53%) | 0 (0.00%) |  |
| **Oral** | 89 (42.79%) | 61 (18.71%) | 27 (15.79%) |  |
| **Insulin** | 18 (8.65%) | 6 (1.84%) | 1 (0.58%) |  |
| Intraoperative variables |  |  |  |  |
| **Total insulin dose, IU** | 0 [0, 16] | 0 [0, 10] | 8 [0, 17] | 0.010 |
| **Mean glucose, mg/dL** | 139 [124, 163] | 129 [117, 147] | 138 [126, 159] | <0.001 |
| **Peak glucose, mg/dL** | 177 [150, 203] | 160 [140, 198] | 173 [152, 209] | <0.001 |
| With hypoglycemic episodec | 1 (0.48%) | 2 (0.61%) | 0 (0.00%) | 0.601 |
| With hyperglycemic episoded | 58 (27.88%) | 79 (24.23%) | 54 (31.58%) | 0.206 |
| **CV, %e** | 18.15 [12.94, 23.90] | 20.55 [15.81, 25.90] | 21.69 [15.92, 28.04] | 0.001 |
| CV by quartile |  |  |  | 0.058 |
| First quartile (< 15) | 67 (32.21%) | 70 (21.47%) | 37 (21.64%) |  |
| Second quartile (15-20) | 55 (26.44%) | 86 (26.38%) | 39 (22.81%) |  |
| Third quartile (20-25) | 45 (21.63%) | 86 (26.38%) | 46 (26.90%) |  |
| Fourth quartile (> 25) | 41 (19.71%) | 84 (25.77%) | 49 (28.65%) |  |

**Note:** Values are presented as median [IQR], or number (percentage). aIsolated valve surgery, CABG combined with valve surgery. bIsolated aortic surgery, CABG and/or valve surgery combined with aortic surgery. cNumber of patients with any hypoglycemic episode (< 60 mg/dL). dNumber of patients with any hyperglycemic episode (> 200 mg/dL). e(Standard deviation / Mean) x 100.

**Abbreviations:** CABG, coronary artery bypass graft surgery; CV, coefficient of variation.

**Supplement Table 6** Logistic regression models for delirium after cardiac surgery according to different types of cardiac surgery.

| Variable | Unadjusted odd ratio  (95% CI) | *p* value | Adjusted odd ratio  (95% CI) | *p* value |
| --- | --- | --- | --- | --- |
| **Isolated CABG** |  |  |  |  |
| Age ≥ 65 yearsa | 3.420 (1.682, 6.955) | <0.001 | 3.241 (1.453, 7.231) | 0.004 |
| Education below high school | 2.076 (1.096, 3.931) | 0.025 | 1.407 (0.666, 2.973) | 0.371 |
| GFR < 60 mL/min/1.73m2 | 3.621 (1.910, 6.864) | <0.001 | 3.776 (1.840, 7.749) | <0.001 |
| CPB duration ≥ 88 min2 | 1.561 (0.818, 2.979) | 0.177 | 1.523 (0.714, 3.249) | 0.276 |
| Mean BIS ≥ 34a | 1.354 (0.744, 2.464) | 0.321 | 1.273 (0.640, 2.532) | 0.492 |
| VIS at end of surgery ≥ 5.0a,b | 1.547 (0.806, 2.969) | 0.189 | 1.309 (0.631, 2.712) | 0.469 |
| Glycemic CVc |  |  |  |  |
| First quartile (< 15%) | 1.0 (Reference) |  | 1.0 (Reference) |  |
| Second quartile (15-20%) | 2.050 (0.879, 4.782) | 0.097 | 2.204 (0.877, 5.542) | 0.093 |
| Third quartile (20-25%) | 1.483 (0.589, 3.733) | 0.403 | 1.417 (0.522, 3.846) | 0.494 |
| Fourth quartile (> 25%) | 4.812 (2.007, 11.540) | <0.001 | 4.675 (1.761, 12.407) | 0.002 |
| **Valve surgeryd** | |  |  |  |
| Age ≥ 65 yearsa | 2.960 (1.880, 4.659) | <0.001 | 1.959 (1.142, 3.361) | 0.015 |
| Education below high school | 2.488 (1.550, 3.993) | <0.001 | 1.785 (1.005, 3.170) | 0.048 |
| GFR < 60 mL/min/1.73m2 | 2.401 (1.426, 4.040) | <0.001 | 2.109 (1.186, 3.750) | 0.011 |
| CPB duration ≥ 88 min2 | 1.690 (1.084, 2.636) | 0.021 | 1.307 (0.791, 2.159) | 0.296 |
| Mean BIS ≥ 34a | 1.391 (0.893, 2.166) | 0.145 | 1.445 (0.880, 2.372) | 0.146 |
| VIS at end of surgery ≥ 5.0a,b | 1.714 (1.100, 2.672) | 0.017 | 1.660 (1.005, 2.742) | 0.048 |
| Glycemic CVc |  |  |  |  |
| First quartile (< 15%) | 1.0 (Reference) |  | 1.0 (Reference) |  |
| Second quartile (15-20%) | 1.040 (0.532, 2.031) | 0.909 | 1.030 (0.502, 2.113) | 0.937 |
| Third quartile (20-25%) | 1.618 (0.840, 3.116) | 0.150 | 1.624 (0.800, 3.297) | 0.179 |
| Fourth quartile (> 25%) | 3.494 (1.793, 6.808) | <0.001 | 3.780 (1.838, 7.777) | <0.001 |
| **Aortic surgerye** | |  |  |  |
| Age ≥ 65 yearsa | 1.300 (0.695, 2.410) | 0.415 | 0.696 (0.314, 1.542) | 0.371 |
| Education below high school | 1.880 (0.986, 3.580) | 0.055 | 2.226 (1.003, 4.942) | 0.049 |
| GFR < 60 mL/min/1.73m2 | 3.19 (1.412, 7.200) | 0.005 | 3.062 (1.208, 7.762) | 0.018 |
| CPB duration ≥ 88 min2 | 3.295 (1.579, 6.880) | 0.001 | 3.551 (1.522, 8.285) | 0.003 |
| Mean BIS ≥ 34a | 1.650 (0.892, 3.060) | 0.110 | 1.581 (0.766, 3.263) | 0.215 |
| VIS at end of surgery ≥ 5.0a,b | 3.333 (1.728, 6.430) | <0.001 | 2.915 (1.388, 6.121) | 0.005 |
| Glycemic CVc |  |  |  |  |
| First quartile (< 15%) | 1.0 (Reference) |  | 1.0 (Reference) |  |
| Second quartile (15-20%) | 1.238 (0.503, 3.050) | 0.642 | 1.255 (0.452, 3.483) | 0.663 |
| Third quartile (20-25%) | 2.206 (0.909, 5.350) | 0.080 | 3.159 (1.138, 8.770) | 0.027 |
| Fourth quartile (> 25%) | 2.941 (1.201, 7.200) | 0.018 | 2.743 (1.005, 7.484) | 0.049 |

**Note:**. aCategorized by median value. b1 x dopamine + 1 x dobutamine + 100 x isoproterenolol + 100 x norepinephrine + 100 x epinephrine + 10 x milrinone + 10000 x vasopressin. c(Standard deviation / Mean) x 100. dIsolated valvular surgery, CABG combined with valvular surgery. eIsolated aortic surgery, CABG and/or valvular surgery combined with aortic surgery.

**Abbreviations:** CI, confidence interval; CABG, coronary artery bypass graft surgery; GFR, glomerular filtration rate; CPB, cardiopulmonary bypass; BIS, bispectral index; VIS, vasoactive-inotropic score; CV, coefficient of variation.
